# Supplementary material for: DOCK2 is involved in the host genetics and biology of severe COVID-19
Source: Springer Nature journal article supplement (doi:10.1038/s41586-022-05163-5), 2022-08-08
Supplement: 41586_2022_5163_MOESM1_ESM.pdf [file 41586_2022_5163_MOESM1_ESM.pdf]

---

**Supplementary information**

---

***DOCK2* is involved in the host genetics and biology of severe COVID-19**

---

In the format provided by the authors and unedited

## Supplementary Information

DOCK2 is involved in the host genetics and biology of severe COVID-19

The Japan COVID-19 Task Force.

Corresponding to:

Koichi Fukunaga (kfukunaga@keio.jp), Division of Pulmonary Medicine, Department of Medicine, Keio University School of Medicine, Tokyo, Japan.

Yukinori Okada (yokada@sg.med.osaka-u.ac.jp), Department of Statistical Genetics, Osaka University Graduate School of Medicine, Suita, Japan.

### Table of Contents

|                                                                                                                                |          |
|--------------------------------------------------------------------------------------------------------------------------------|----------|
| <b>Supplementary Figure</b> .....                                                                                              | <b>2</b> |
| 1. Biological impact of the <i>DOCK2</i> risk variant in primary cells .....                                                   | 2        |
| 2. Knockdown of <i>DOCK2</i> by CRISPR system .....                                                                            | 3        |
| <b>Supplementary Table</b> .....                                                                                               | <b>4</b> |
| 1. A list of the medical institutes participating to Japan COVID-19 Task Force.....                                            | 4        |
| 2. Characteristics of the study participants .....                                                                             | 7        |
| 3. Associations of the previously reported COVID-19 risk variants .....                                                        | 9        |
| 4. HLA variant associations with COVID-19 risk .....                                                                           | 10       |
| 5. Associations of the ABO blood type with COVID-19 risk .....                                                                 | 11       |
| 6. Details of the GWAS studies of the exposure phenotypes in the Mendelian randomization analysis .....                        | 13       |
| 7. Results of the cross-population Mendelian randomization analysis on COVID-19 .....                                          | 14       |
| 8. Detailed associations of the <i>DOCK2</i> rs60200309-A allele with COVID-19 susceptibility .....                            | 15       |
| 9. A replication study of the <i>DOCK2</i> variant in the pan-ancestry meta-analysis .....                                     | 16       |
| 10. eQTL analysis result of the variants around the <i>DOCK2</i> region .....                                                  | 17       |
| 11. The guide RNA for <i>DOCK2</i> knockdown used in LentiCRISPR system and sgRNA sequence annotation .....                    | 18       |
| 12. The primers and probes used for evaluation of lung cytokine expression profile in SARS-CoV-2 infected Syrian hamster ..... | 19       |

Supplementary Figure 1. Biological impact of the *DOCK2* risk variant in primary cells

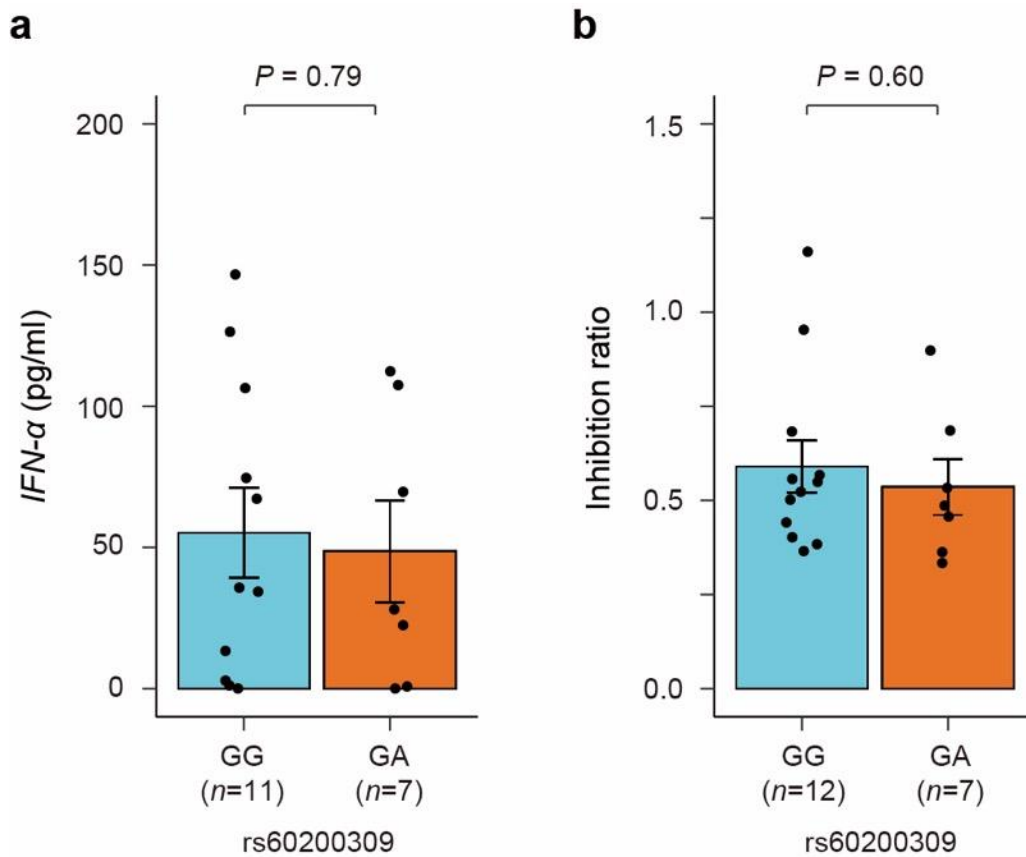

(a) The impact of the *DOCK2* risk variant on interferon- $\alpha$  (*IFN- $\alpha$* ) production ability in pDC. Sorted pDC were stimulated with CpG. (b) The impact of the *DOCK2* risk variant on chemotaxis in CD3<sup>+</sup> T cells. CD3<sup>+</sup> T cells were stimulated with CXCL12 or CXCL12 + CPYPP, and inhibition ratio by CPYPP was estimated. In (a) and (b), data shows mean + s.e.m., and differences between the groups were evaluated using two-sided Welch's *t*-test.

Supplementary Figure 2. Knockdown of *DOCK2* by CRISPR system

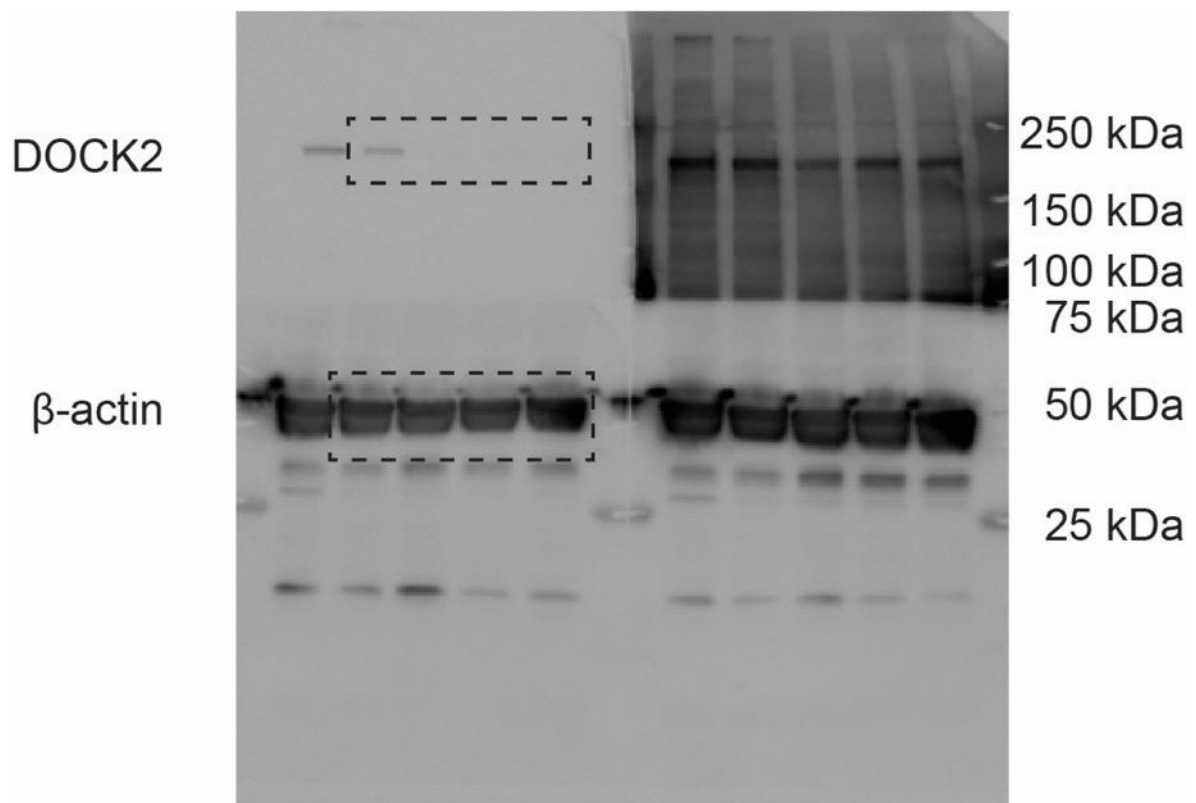

Full size image from **Extended Data Fig. 8c**.

**Supplementary Table 1. A list of the medical institutes participating to Japan COVID-19 Task Force**

|                                                                        |
|------------------------------------------------------------------------|
| Aichi Cancer Center Hospital                                           |
| Chiba University Graduate School of Medicine                           |
| Daini Osaka Police Hospital                                            |
| Eiju General Hospital                                                  |
| Faculty of Medicine                                                    |
| Fujioka General Hospital                                               |
| Fujisawa City Hospital                                                 |
| Fukujuji hospital                                                      |
| Fukuoka Tokushukai Hospital                                            |
| Fukuoka University                                                     |
| Fukuoka University Hospital                                            |
| Fukushima Medical University                                           |
| Gifu University School of Medicine Graduate School of Medicine         |
| Graduate School of Tokyo Institute of Technology                       |
| Gunma University Graduate School of Medicine                           |
| Himeji St. Mary's Hospital                                             |
| International University of Health and Welfare Shioya Hospital         |
| Ishikawa Prefectural Central Hospital                                  |
| JA Toride medical hospital                                             |
| Japan Community Health care Organization Kanazawa Hospital             |
| Japanese Red Cross Medical Center                                      |
| JCHO (Japan Community Health care Organization) Saitama Medical Center |
| Juntendo University Graduate School of Medicine                        |
| Kanagawa Cardiovascular and Respiratory Center                         |
| Kansai Electric Power Hospital                                         |
| Kansai Medical University General Medical Center                       |
| Kansai Rosai Hospital                                                  |
| Kanto Rosai Hospital                                                   |
| Kawasaki Municipal Ida Hospital                                        |
| Keio University Hospital                                               |
| Keio University School of Medicine                                     |
| Keiyu Hospital                                                         |
| KINSHUKAI Hanwa The Second Hospital                                    |
| Kiryu Kosei General Hospital                                           |
| Kitasato University                                                    |
| Kitasato University Kitasato Institute Hospital                        |
| KKR Sapporo Medical Center                                             |
| Kobe University Graduate School of Medicine                            |
| Kumamoto City Hospital                                                 |
| Kurume University School of Medicine                                   |
| Kyoto Prefectural University of Medicine                               |

|                                                                         |
|-------------------------------------------------------------------------|
| Kyoto University Graduate School of Medicine                            |
| Kyushu University Graduate School of Medical Sciences                   |
| Matsumoto City Hospital                                                 |
| Musashino Red Cross Hospital                                            |
| Nagoya University Graduate School of Medicine                           |
| National Center for Global Health and Medicine                          |
| National Defense Medical College                                        |
| National Hospital Organization Hokkaido Medical Center                  |
| National Hospital Organization Kumamoto Medical Center                  |
| National Hospital Organization Kyoto Medical Center                     |
| National Hospital Organization Kyushu Medical Center                    |
| National hospital organization Saitama Hospital                         |
| National Hospital Organization Tokyo Hospital                           |
| National Hospital Organization Tokyo Medical Center                     |
| NHO Kanazawa Medical Center                                             |
| Nihon University School of Medicine                                     |
| Niigata University                                                      |
| Okayama Rosai Hospital                                                  |
| Ome Municipal General Hospital                                          |
| Osaka Saiseikai Nakatsu Hospital                                        |
| Osaka University Graduate School of Medicine                            |
| Osaka University Hospital                                               |
| Saiseikai Kumamoto Hospital                                             |
| Saiseikai Utsunomiya Hospital                                           |
| Saiseikai Yokohamashi Nanbu Hospital                                    |
| Saitama Cardiovascular and Respiratory Center                           |
| Saitama City Hospital                                                   |
| Sano Kosei General Hospital                                             |
| Sapporo City General Hospital                                           |
| Showa University                                                        |
| Showa University Koto Toyosu Hospital                                   |
| St Marianna University School of Medicine, Yokohama-City Seibu Hospital |
| St. Marianna University School of Medicine                              |
| Tachikawa Hospital                                                      |
| The Institute of Medical Science, the University of Tokyo               |
| Toho University Ohashi Medical Center                                   |
| Tohoku University Graduate School of Medicine                           |
| Tokai University School of Medicine                                     |
| Tokyo Medical and Dental University                                     |
| Tokyo Medical and Dental University Hospital of Medicine                |
| Tokyo Medical University Hospital                                       |
| Tokyo Medical University Ibaraki Medical Center                         |
| Tokyo Metropolitan Police Hospital                                      |
| Tokyo Saiseikai Central Hospital                                        |

|                                                          |
|----------------------------------------------------------|
| Tokyo Women's Medical University Medical Center East     |
| Tokyo Medical and Dental University Hospital of Medicine |
| Tosei General Hospital                                   |
| Toyohashi Municipal Hospital                             |
| Tsukuba Kinen General Hospital                           |
| Uji-Tokushukai Medical Center                            |
| University of Tsukuba                                    |
| Yamagata University Faculty of Medicine                  |

Medical institutes and hospitals contributing to the current GWAS study are listed.

## Supplementary Table 2. Characteristics of the study participants

### GWAS participants

| Subjects        | Age        | Severity   | No. subjects | Age (mean±SD) | Male proportion (%) |
|-----------------|------------|------------|--------------|---------------|---------------------|
| COVID-19 cases* | All age    | All        | 2,393        | 56.0 ± 18.9   | 64.2                |
|                 |            | Severe     | 990          | 65.3 ± 13.9   | 73.9                |
|                 |            | Non-severe | 1,391        | 49.3 ± 19.2   | 57.2                |
|                 | Age < 65   | All        | 1,484        | 44.1 ± 13.3   | 65.7                |
|                 |            | Severe     | 440          | 52.6 ± 9.2    | 81.8                |
|                 |            | Non-severe | 1,041        | 40.5 ± 13.1   | 58.9                |
| Age ≥ 65        | All        | 909        | 75.4 ± 7.1   | 61.7          |                     |
|                 | Severe     | 550        | 75.5 ± 6.9   | 67.6          |                     |
|                 | Non-severe | 350        | 75.2 ± 7.6   | 52.3          |                     |
| Controls        | All Age    | -          | 3,289        | 53.1 ± 16.8   | 47.5                |
|                 | Age < 65   | -          | 2,377        | 45.1 ± 12.1   | 47.8                |
|                 | Age ≥ 65   | -          | 912          | 74.0 ± 6.2    | 46.5                |

\* COVID-19 cases were collected from April 2020 to January 2021.

### Replication participants

| Subjects        | Age      | Severity | No. subjects | Age (mean±SD) | Male proportion (%) |
|-----------------|----------|----------|--------------|---------------|---------------------|
| COVID-19 cases* | All Age  | -        | 1,243        | 58.4 ± 14.4   | 71.8                |
|                 | Age < 65 | Severe   | 833          | 50.3 ± 9.6    | 76.1                |
|                 | Age ≥ 65 | -        | 410          | 74.8 ± 6.5    | 62.9                |
| Controls        | All Age  | -        | 3,769        | 67.1 ± 13.4   | 59.0                |
|                 | Age < 65 | -        | 1,242        | 52.0 ± 11.0   | 50.1                |
|                 | Age ≥ 65 | -        | 2,527        | 74.6 ± 6.2    | 63.4                |

\* COVID-19 cases were collected from February 2021 to September 2021.



## Baseline characteristics of GWAS and replication participants

| Cohort                 | GWAS participants      |                                 |                         |                                  | Replication participants          |                                  |
|------------------------|------------------------|---------------------------------|-------------------------|----------------------------------|-----------------------------------|----------------------------------|
|                        | All age<br>(n = 2,393) | All age and Severe<br>(n = 990) | Age < 65<br>(n = 1,484) | Age < 65 and Severe<br>(n = 440) | All age and Severe<br>(n = 1,243) | Age < 65 and Severe<br>(n = 833) |
| Characteristics        |                        |                                 |                         |                                  |                                   |                                  |
| Body-mass index        | 23.7 (21.4-26.7)       | 24.7 (22.2-27.5)                | 24.2 (21.8-27.4)        | 26.6 (24.2-30.0)                 | 25.7 (22.9-29.0)                  | 26.6 (23.8-29.9)                 |
| Smoking status (Never) | 860 (52.7)             | 313 (48.2)                      | 527 (53.0)              | 128 (44.0)                       | 376 (48.5)                        | 234 (48.0)                       |
| Comorbidities          |                        |                                 |                         |                                  |                                   |                                  |
| Hypertension           | 592 (33.6)             | 344 (47.9)                      | 208 (19.5)              | 109 (34.6)                       | 347 (41.8)                        | 169 (32.7)                       |
| Diabetes mellitus      | 391 (22.2)             | 232 (32.4)                      | 172 (16.0)              | 93 (29.2)                        | 212 (25.5)                        | 123 (23.8)                       |
| Hyperuricemia          | 186 (10.6)             | 98 (13.9)                       | 106 (9.9)               | 53 (17.1)                        | 96 (11.5)                         | 51 (9.8)                         |
| Cardiovascular disease | 180 (10.2)             | 109 (15.2)                      | 46 (4.3)                | 25 (7.9)                         | 94 (11.3)                         | 29 (5.6)                         |
| Malignancy             | 122 (7.0)              | 63 (8.9)                        | 41 (3.8)                | 18 (5.8)                         | 52 (6.3)                          | 14 (2.7)                         |
| Autoimmune disease     | 67 (3.8)               | 35 (4.9)                        | 38 (3.5)                | 18 (5.7)                         | 29 (3.5)                          | 15 (2.9)                         |
| COPD                   | 77 (4.4)               | 59 (8.3)                        | 28 (2.6)                | 21 (6.6)                         | 42 (5.1)                          | 11 (2.1)                         |
| Asthma                 | 121 (7.0)              | 42 (6.0)                        | 79 (7.5)                | 26 (8.4)                         | 56 (6.8)                          | 38 (7.5)                         |
| Chronic liver disease  | 67 (3.9)               | 32 (4.6)                        | 46 (4.4)                | 19 (6.3)                         | 40 (4.9)                          | 25 (4.9)                         |
| Chronic kidney disease | 113 (6.7)              | 77 (11.1)                       | 39 (3.8)                | 18 (6.0)                         | 76 (9.4)                          | 28 (5.5)                         |

Data are median (interquartile range) or number (%). COPD=chronic obstructive pulmonary disease.

### Bulk RNA-seq participants

| Age      | Severity   | No. subjects | Age (mean±SD) | Male proportion (%) |
|----------|------------|--------------|---------------|---------------------|
| All age  | All        | 473          | 59.6 ± 17.7   | 67.9                |
|          | Severe     | 368          | 64.3 ± 14.8   | 70.9                |
|          | Non-severe | 105          | 42.9 ± 17.2   | 57.1                |
| Age < 65 | All        | 270          | 47.4 ± 12.8   | 74.1                |
|          | Severe     | 179          | 52.0 ± 9.8    | 81.0                |
|          | Non-severe | 91           | 38.4 ± 13.2   | 60.4                |
| Age ≥ 65 | All        | 203          | 75.8 ± 7.4    | 59.6                |
|          | Severe     | 189          | 76.0 ± 7.4    | 61.4                |
|          | Non-severe | 14           | 72.8 ± 6.4    | 35.7                |

**Supplementary Table 3. Associations of the previously reported COVID-19 risk variants**

| rsID       | Chr:position<br>(b37) | Allele<br>Risk/non-risk | Gene    | Phenotype                           | Risk allele frequency |         | OR (95%CI)              | P                          |
|------------|-----------------------|-------------------------|---------|-------------------------------------|-----------------------|---------|-------------------------|----------------------------|
|            |                       |                         |         |                                     | Case                  | Control |                         |                            |
| rs2271616  | 3:45838013            | T/G                     | SLC6A20 | COVID-19 vs control                 | 0.128                 | 0.129   | 0.98 (0.87-1.10)        | 0.75                       |
|            |                       |                         |         | Severe COVID-19 vs control          | 0.129                 | 0.129   | 0.97 (0.81-1.14)        | 0.68                       |
|            |                       |                         |         | COVID-19 vs control (age<65)        | 0.129                 | 0.129   | 1.01 (0.87-1.16)        | 0.92                       |
|            |                       |                         |         | Severe COVID-19 vs control (age<65) | 0.134                 | 0.129   | 0.97 (0.77-1.23)        | 0.79                       |
| rs35081325 | 3:45889921            | T/A                     | LZTFL1  | COVID-19 vs control                 | 0.0021                | 0.0013  | 2.49 (0.77-8.08)        | 0.13                       |
|            |                       |                         |         | Severe COVID-19 vs control          | 0.0032                | 0.0013  | <b>7.06 (1.63-30.6)</b> | <b>0.0090</b>              |
|            |                       |                         |         | COVID-19 vs control (age<65)        | 0.0021                | 0.0013  | 2.22 (0.53-9.39)        | 0.28                       |
|            |                       |                         |         | Severe COVID-19 vs control (age<65) | 0.0030                | 0.0013  | <b>11.8 (1.64-85.5)</b> | <b>0.014</b>               |
| rs11919389 | 3:101424458           | T/C                     | RPL24   | COVID-19 vs control                 | 0.626                 | 0.625   | 1.02 (0.94-1.10)        | 0.66                       |
|            |                       |                         |         | Severe COVID-19 vs control          | 0.619                 | 0.625   | 1.02 (0.91-1.14)        | 0.79                       |
|            |                       |                         |         | COVID-19 vs control (age<65)        | 0.623                 | 0.632   | 0.97 (0.88-1.07)        | 0.56                       |
|            |                       |                         |         | Severe COVID-19 vs control (age<65) | 0.615                 | 0.632   | 0.95 (0.81-1.12)        | 0.57                       |
| rs1886814  | 6:41502683            | C/A                     | FOXP4   | COVID-19 vs control                 | 0.307                 | 0.285   | <b>1.14 (1.04-1.24)</b> | <b>0.0035</b>              |
|            |                       |                         |         | Severe COVID-19 vs control          | 0.317                 | 0.285   | <b>1.29 (1.13-1.46)</b> | <b>9.1×10<sup>-5</sup></b> |
|            |                       |                         |         | COVID-19 vs control (age<65)        | 0.314                 | 0.285   | <b>1.17 (1.05-1.30)</b> | <b>0.0045</b>              |
|            |                       |                         |         | Severe COVID-19 vs control (age<65) | 0.340                 | 0.285   | <b>1.42 (1.19-1.69)</b> | <b>1.2×10<sup>-4</sup></b> |
| rs72711165 | 8:125336564           | C/T                     | TMEM65  | COVID-19 vs control                 | 0.035                 | 0.031   | 1.15 (0.93-1.42)        | 0.21                       |
|            |                       |                         |         | Severe COVID-19 vs control          | 0.034                 | 0.031   | 1.15 (0.85-1.57)        | 0.37                       |
|            |                       |                         |         | COVID-19 vs control (age<65)        | 0.040                 | 0.030   | <b>1.31 (1.01-1.70)</b> | <b>0.040</b>               |
|            |                       |                         |         | Severe COVID-19 vs control (age<65) | 0.044                 | 0.030   | 1.42 (0.94-2.16)        | 0.094                      |
| rs529565   | 9:136149500           | C/T                     | ABO     | COVID-19 vs control                 | 0.475                 | 0.456   | 1.08 (1.00-1.16)        | 0.057                      |
|            |                       |                         |         | Severe COVID-19 vs control          | 0.494                 | 0.456   | <b>1.18 (1.06-1.32)</b> | <b>0.0028</b>              |
|            |                       |                         |         | COVID-19 vs control (age<65)        | 0.476                 | 0.458   | 1.08 (0.99-1.19)        | 0.089                      |
|            |                       |                         |         | Severe COVID-19 vs control (age<65) | 0.510                 | 0.458   | <b>1.22 (1.04-1.42)</b> | <b>0.012</b>               |
| rs10774671 | 12:113357193          | A/G                     | OAS1    | COVID-19 vs control                 | 0.800                 | 0.791   | 1.06 (0.96-1.17)        | 0.24                       |
|            |                       |                         |         | Severe COVID-19 vs control          | 0.802                 | 0.791   | 1.08 (0.94-1.24)        | 0.30                       |
|            |                       |                         |         | COVID-19 vs control (age<65)        | 0.805                 | 0.794   | 1.07 (0.95-1.20)        | 0.28                       |
|            |                       |                         |         | Severe COVID-19 vs control (age<65) | 0.814                 | 0.794   | 1.09 (0.89-1.34)        | 0.38                       |
| rs1819040  | 17:44219831           | T/A                     | KANSL1  | Not imputable                       |                       |         |                         |                            |
| rs77534576 | 17:47940666           | T/C                     | TAC4    | COVID-19 vs control                 | 0.048                 | 0.045   | 1.07 (0.89-1.29)        | 0.46                       |
|            |                       |                         |         | Severe COVID-19 vs control          | 0.057                 | 0.045   | <b>1.29 (1.01-1.65)</b> | <b>0.043</b>               |
|            |                       |                         |         | COVID-19 vs control (age<65)        | 0.051                 | 0.044   | 1.16 (0.93-1.45)        | 0.20                       |
|            |                       |                         |         | Severe COVID-19 vs control (age<65) | 0.060                 | 0.044   | 1.33 (0.95-1.88)        | 0.098                      |
| rs2109069  | 19:4719443            | A/G                     | DPP9    | COVID-19 vs control                 | 0.123                 | 0.111   | 1.10 (0.98-1.24)        | 0.12                       |
|            |                       |                         |         | Severe COVID-19 vs control          | 0.133                 | 0.111   | <b>1.20 (1.02-1.42)</b> | <b>0.031</b>               |
|            |                       |                         |         | COVID-19 vs control (age<65)        | 0.120                 | 0.113   | 1.06 (0.91-1.22)        | 0.46                       |
|            |                       |                         |         | Severe COVID-19 vs control (age<65) | 0.131                 | 0.113   | 1.11 (0.88-1.41)        | 0.39                       |
| rs74956615 | 19:10427721           | A/T                     | RAVER1  | Not imputable                       |                       |         |                         |                            |
| rs4801778  | 19:49370609           | G/T                     | PLEKHA4 | COVID-19 vs control                 | 0.978                 | 0.975   | 1.15 (0.88-1.49)        | 0.30                       |
|            |                       |                         |         | Severe COVID-19 vs control          | 0.977                 | 0.975   | 1.06 (0.73-1.54)        | 0.77                       |
|            |                       |                         |         | COVID-19 vs control (age<65)        | 0.978                 | 0.973   | 1.23 (0.89-1.69)        | 0.20                       |
|            |                       |                         |         | Severe COVID-19 vs control (age<65) | 0.980                 | 0.973   | 1.29 (0.74-2.24)        | 0.37                       |
| rs13050728 | 21:34615210           | T/C                     | IFNAR2  | COVID-19 vs control                 | 0.573                 | 0.549   | <b>1.10 (1.02-1.19)</b> | <b>0.015</b>               |
|            |                       |                         |         | Severe COVID-19 vs control          | 0.572                 | 0.549   | 1.08 (0.97-1.22)        | 0.17                       |
|            |                       |                         |         | COVID-19 vs control (age<65)        | 0.580                 | 0.543   | <b>1.16 (1.06-1.28)</b> | <b>0.0024</b>              |
|            |                       |                         |         | Severe COVID-19 vs control (age<65) | 0.605                 | 0.543   | <b>1.28 (1.08-1.50)</b> | <b>0.0039</b>              |

Uncorrected *P* values are shown. Associations with *P* < 0.05 are highlighted in bold.

**Supplementary Table 4. HLA variant associations with COVID-19 risk**

(Results are indicated in a separate Microsoft Excel file)

## Supplementary Table 5. Associations of the ABO blood type with COVID-19 risk

### Associations of the target blood type compared with other blood types

| Age      | Phenotype                  | Target vs other blood types | Target blood type No. and freq. |                       |                       |                          | OR (95%CI)              | P             |
|----------|----------------------------|-----------------------------|---------------------------------|-----------------------|-----------------------|--------------------------|-------------------------|---------------|
|          |                            |                             | N <sub>cases</sub>              | N <sub>controls</sub> | freq <sub>Cases</sub> | freq <sub>controls</sub> |                         |               |
| All age  | COVID-19 vs control        | A vs AB/B/O                 | 974                             | 1,274                 | 0.411                 | 0.390                    | 1.10 (0.98-1.23)        | 0.093         |
|          |                            | B vs A/AB/O                 | 505                             | 712                   | 0.213                 | 0.218                    | 0.95 (0.83-1.09)        | 0.46          |
|          |                            | AB vs A/B/O                 | 251                             | 310                   | 0.106                 | 0.095                    | 1.13 (0.95-1.35)        | 0.18          |
|          |                            | O vs A/AB/B                 | 639                             | 968                   | 0.270                 | 0.297                    | <b>0.88 (0.78-1.00)</b> | <b>0.041</b>  |
|          | Severe COVID-19 vs control | A vs AB/B/O                 | 398                             | 1,274                 | 0.407                 | 0.390                    | 1.04 (0.89-1.22)        | 0.61          |
|          |                            | B vs A/AB/O                 | 216                             | 712                   | 0.221                 | 0.218                    | 1.00 (0.83-1.21)        | 0.96          |
|          |                            | AB vs A/B/O                 | 117                             | 310                   | 0.120                 | 0.095                    | <b>1.41 (1.10-1.81)</b> | <b>0.0065</b> |
|          |                            | O vs A/AB/B                 | 248                             | 968                   | 0.253                 | 0.297                    | <b>0.81 (0.68-0.96)</b> | <b>0.016</b>  |
| Age < 65 | COVID-19 vs control        | A vs AB/B/O                 | 607                             | 900                   | 0.412                 | 0.381                    | <b>1.18 (1.03-1.35)</b> | <b>0.017</b>  |
|          |                            | B vs A/AB/O                 | 315                             | 524                   | 0.214                 | 0.222                    | 0.92 (0.78-1.08)        | 0.33          |
|          |                            | AB vs A/B/O                 | 161                             | 235                   | 0.109                 | 0.099                    | 1.09 (0.88-1.36)        | 0.41          |
|          |                            | O vs A/AB/B                 | 390                             | 703                   | 0.265                 | 0.298                    | <b>0.85 (0.73-0.98)</b> | <b>0.027</b>  |
|          | Severe COVID-19 vs control | A vs AB/B/O                 | 173                             | 900                   | 0.394                 | 0.381                    | 1.08 (0.86-1.35)        | 0.52          |
|          |                            | B vs A/AB/O                 | 103                             | 524                   | 0.235                 | 0.222                    | 1.06 (0.81-1.37)        | 0.67          |
|          |                            | AB vs A/B/O                 | 60                              | 235                   | 0.137                 | 0.099                    | <b>1.40 (1.00-1.94)</b> | <b>0.048</b>  |
|          |                            | O vs A/AB/B                 | 103                             | 703                   | 0.235                 | 0.298                    | <b>0.73 (0.56-0.93)</b> | <b>0.014</b>  |

### Associations of the target blood type compared with the O blood type

| Age      | Phenotype                  | Target blood types vs O | Target blood type freq. |         | OR (95%CI)              | P             |
|----------|----------------------------|-------------------------|-------------------------|---------|-------------------------|---------------|
|          |                            |                         | Cases                   | control |                         |               |
| All age  | COVID-19 vs control        | A vs O                  | 0.411                   | 0.390   | <b>1.16 (1.02-1.32)</b> | <b>0.029</b>  |
|          |                            | B vs O                  | 0.213                   | 0.218   | 1.05 (0.90-1.23)        | 0.52          |
|          |                            | AB vs O                 | 0.106                   | 0.095   | <b>1.22 (1.00-1.48)</b> | <b>0.050</b>  |
|          | Severe COVID-19 vs control | A vs O                  | 0.407                   | 0.390   | 1.20 (0.99-1.46)        | 0.068         |
|          |                            | B vs O                  | 0.221                   | 0.218   | 1.17 (0.93-1.46)        | 0.18          |
|          |                            | AB vs O                 | 0.120                   | 0.095   | <b>1.57 (1.19-2.08)</b> | <b>0.0015</b> |
| Age < 65 | COVID-19 vs control        | A vs O                  | 0.412                   | 0.381   | <b>1.25 (1.06-1.48)</b> | <b>0.0074</b> |
|          |                            | B vs O                  | 0.214                   | 0.222   | 1.06 (0.88-1.28)        | 0.55          |
|          |                            | AB vs O                 | 0.109                   | 0.099   | 1.23 (0.96-1.56)        | 0.097         |
|          | Severe COVID-19 vs control | A vs O                  | 0.394                   | 0.381   | 1.32 (0.99-1.76)        | 0.057         |
|          |                            | B vs O                  | 0.235                   | 0.222   | 1.32 (0.96-1.82)        | 0.084         |
|          |                            | AB vs O                 | 0.137                   | 0.099   | <b>1.67 (1.14-2.44)</b> | <b>0.0081</b> |

### Associations of the target blood type compared with the A blood type

| Age      | Phenotype                  | Target blood types vs A | Target blood type freq. |         | OR (95%CI)              | P             |
|----------|----------------------------|-------------------------|-------------------------|---------|-------------------------|---------------|
|          |                            |                         | Cases                   | control |                         |               |
| All age  | COVID-19 vs control        | B vs A                  | 0.213                   | 0.218   | 0.91 (0.79-1.05)        | 0.21          |
|          |                            | AB vs A                 | 0.106                   | 0.095   | 1.06 (0.87-1.28)        | 0.57          |
|          |                            | O vs A                  | 0.270                   | 0.297   | <b>0.86 (0.76-0.98)</b> | <b>0.029</b>  |
|          | Severe COVID-19 vs control | B vs A                  | 0.221                   | 0.218   | 0.98 (0.80-1.20)        | 0.85          |
|          |                            | AB vs A                 | 0.120                   | 0.095   | <b>1.34 (1.03-1.75)</b> | <b>0.029</b>  |
|          |                            | O vs A                  | 0.253                   | 0.297   | 0.83 (0.69-1.01)        | 0.068         |
| Age < 65 | COVID-19 vs control        | B vs A                  | 0.214                   | 0.222   | 0.85 (0.71-1.02)        | 0.079         |
|          |                            | AB vs A                 | 0.109                   | 0.099   | 0.98 (0.78-1.23)        | 0.87          |
|          |                            | O vs A                  | 0.265                   | 0.298   | <b>0.80 (0.68-0.94)</b> | <b>0.0074</b> |
|          | Severe COVID-19 vs control | B vs A                  | 0.235                   | 0.222   | 1.01 (0.75-1.35)        | 0.96          |
|          |                            | AB vs A                 | 0.137                   | 0.099   | 1.34 (0.93-1.91)        | 0.12          |
|          |                            | O vs A                  | 0.235                   | 0.298   | 0.76 (0.57-1.01)        | 0.057         |

### Associations of the target blood type compared with the B blood type

| Age      | Phenotype                  | Target blood types vs B | Target blood type freq. |         | OR (95%CI)              | P            |
|----------|----------------------------|-------------------------|-------------------------|---------|-------------------------|--------------|
|          |                            |                         | Cases                   | control |                         |              |
| All age  | COVID-19 vs control        | A vs B                  | 0.411                   | 0.390   | 1.10 (0.95-1.27)        | 0.21         |
|          |                            | AB vs B                 | 0.106                   | 0.095   | 1.16 (0.94-1.43)        | 0.16         |
|          |                            | O vs B                  | 0.270                   | 0.297   | 0.95 (0.81-1.11)        | 0.52         |
|          | Severe COVID-19 vs control | A vs B                  | 0.407                   | 0.390   | 1.02 (0.83-1.26)        | 0.85         |
|          |                            | AB vs B                 | 0.120                   | 0.095   | <b>1.35 (1.01-1.80)</b> | <b>0.041</b> |
|          |                            | O vs B                  | 0.253                   | 0.297   | 0.86 (0.69-1.07)        | 0.18         |
| Age < 65 | COVID-19 vs control        | A vs B                  | 0.412                   | 0.381   | 1.17 (0.98-1.40)        | 0.079        |
|          |                            | AB vs B                 | 0.109                   | 0.099   | 1.15 (0.89-1.47)        | 0.29         |
|          |                            | O vs B                  | 0.265                   | 0.298   | 0.94 (0.78-1.14)        | 0.55         |
|          | Severe COVID-19 vs control | A vs B                  | 0.394                   | 0.381   | 0.99 (0.74-1.33)        | 0.96         |
|          |                            | AB vs B                 | 0.137                   | 0.099   | 1.25 (0.85-1.84)        | 0.26         |
|          |                            | O vs B                  | 0.235                   | 0.298   | 0.76 (0.55-1.04)        | 0.084        |

### Associations of the target blood type compared with the A or B blood types

| Age      | Phenotype                  | Target blood types vs A or B | Target blood type freq. |         | OR (95%CI)              | P            |
|----------|----------------------------|------------------------------|-------------------------|---------|-------------------------|--------------|
|          |                            |                              | Cases                   | control |                         |              |
| All age  | COVID-19 vs control        | AB vs A or B                 | 0.106                   | 0.095   | 1.09 (0.91-1.31)        | 0.34         |
|          |                            | O vs A or B                  | 0.270                   | 0.297   | 0.89 (0.79-1.01)        | 0.072        |
|          | Severe COVID-19 vs control | AB vs A or B                 | 0.120                   | 0.095   | <b>1.34 (1.04-1.73)</b> | <b>0.023</b> |
|          |                            | O vs A or B                  | 0.253                   | 0.297   | 0.84 (0.70-1.01)        | 0.058        |
| Age < 65 | COVID-19 vs control        | AB vs A or B                 | 0.109                   | 0.099   | 1.04 (0.83-1.30)        | 0.73         |
|          |                            | O vs A or B                  | 0.265                   | 0.298   | <b>0.85 (0.73-0.99)</b> | <b>0.035</b> |
|          | Severe COVID-19 vs control | AB vs A or B                 | 0.137                   | 0.099   | 1.29 (0.91-1.81)        | 0.14         |
|          |                            | O vs A or B                  | 0.235                   | 0.298   | <b>0.75 (0.58-0.98)</b> | <b>0.034</b> |

Uncorrected *P* values are shown. Associations with *P* < 0.05 are highlighted in bold.

**Supplementary Table 6. Details of the GWAS studies of the exposure phenotypes in the Mendelian randomization analysis**

| Population                         | Phenotype                                   | No. subjects |          |                                        | Reference                                   | PMID     |
|------------------------------------|---------------------------------------------|--------------|----------|----------------------------------------|---------------------------------------------|----------|
|                                    |                                             | Cases        | Controls | Total                                  |                                             |          |
| Japanese                           | Body mass index (BMI)                       | -            | -        | 173,430                                | Akiyama et al. <i>Nat Genet</i> (2017)      | 28892062 |
|                                    | Type 2 diabetes (T2D)                       | 77,418       | 356,122  | 433,540                                | Spracklen et al. <i>Nature</i> (2020)       | 32499647 |
|                                    | Cigarettes per day (CPD)                    | -            | -        | 72,655                                 | Matoba et al. <i>Nat Hum Behav</i> (2019)   | 31089300 |
|                                    | Asthma                                      | 8,216        | 201,592  | 209,808                                | Ishigaki et al. <i>Nat Genet</i> (2020)     | 32514122 |
|                                    | Systolic blood pressure (sBP)               | -            | -        | 183,785                                | Takeuchi et al. <i>Nat Commun</i> (2018)    | 30487518 |
|                                    | Diastolic blood pressure (dBP)              | -            | -        | 183,785                                | Takeuchi et al. <i>Nat Commun</i> (2018)    | 30487518 |
|                                    | Estimated glomerular filtration rate (eGFR) | -            | -        | 143,658                                | Kanai et al. <i>Nat Genet</i> (2018)        | 29403010 |
|                                    | Serum uric acids (UA)                       | -            | -        | 121,745                                | Nakatochi et al. <i>Commun Biol</i> (2019)  | 30993211 |
|                                    | Gout                                        | 3,053        | 4,554    | 7,607                                  | Nakayama et al. <i>Ann Rheum Dis</i> (2020) | 32238385 |
|                                    | Rheumatoid arthritis (RA)                   | 4,873        | 17,641   | 22,514                                 | Okada et al. <i>Nature</i> (2014)           | 24390342 |
| Systemic lupus erythematosus (SLE) | 13,377                                      | 194,993      | 208,370  | Yin et al. <i>Ann Rheum Dis</i> (2020) | 33272962                                    |          |
| European                           | Body mass index (BMI)                       | -            | -        | 681,275                                | Yengo et al. <i>Hum Mol Genet</i> (2018)    | 30124842 |
|                                    | Type 2 diabetes (T2D)                       | 148,726      | 965,732  | 1,114,458                              | Vujkovic et al. <i>Nat Genet</i> (2020)     | 32541925 |
|                                    | Cigarettes per day (CPD)                    | -            | -        | 337,334                                | Liu et al. <i>Nat Genet</i> (2019)          | 30643251 |
|                                    | Asthma                                      | 64,538       | 329,321  | 393,859                                | Han et al. <i>Nat Commun</i> (2020)         | 32296059 |
|                                    | Systolic blood pressure (sBP)               | -            | -        | 757,601                                | Evangelou et al. <i>Nat Genet</i> (2018)    | 30224653 |
|                                    | Diastolic blood pressure (dBP)              | -            | -        | 757,601                                | Evangelou et al. <i>Nat Genet</i> (2018)    | 30224653 |
|                                    | Estimated glomerular filtration rate (eGFR) | -            | -        | 567,460                                | Wuttke et al. <i>Nat Genet</i> (2019)       | 31152163 |
|                                    | Serum uric acids (UA)                       | -            | -        | 288,649                                | Tin et al. <i>Nat Genet</i> (2019)          | 31578528 |
|                                    | Gout                                        | 13,179       | 750,634  | 763,813                                | Tin et al. <i>Nat Genet</i> (2019)          | 31578528 |
|                                    | Rheumatoid arthritis (RA)                   | 14,361       | 43,923   | 58,284                                 | Okada et al. <i>Nature</i> (2014)           | 24390342 |
| Systemic lupus erythematosus (SLE) | 5,201                                       | 9,066        | 14,267   | Bentham et al. <i>Nat Genet</i> (2015) | 26502338                                    |          |

**Supplementary Table 7. Results of the cross-population Mendelian randomization analysis on COVID-19**

| Exposure phenotypes (Japanese)              | COVID-19 vs control |               |              |               | Severe COVID-19 vs control |              |              |               | COVID-19 vs control (age<65) |              |              |               | Severe COVID-19 vs control (age<65) |              |              |               |
|---------------------------------------------|---------------------|---------------|--------------|---------------|----------------------------|--------------|--------------|---------------|------------------------------|--------------|--------------|---------------|-------------------------------------|--------------|--------------|---------------|
|                                             | N <sub>SNP</sub>    | Beta          | SE           | P             | N <sub>SNP</sub>           | Beta         | SE           | P             | N <sub>SNP</sub>             | Beta         | SE           | P             | N <sub>SNP</sub>                    | Beta         | SE           | P             |
| Body mass index (BMI)                       | 76                  | 0.296         | 0.173        | 0.087         | 76                         | <b>0.676</b> | <b>0.249</b> | <b>0.0067</b> | 76                           | 0.380        | 0.213        | 0.075         | 76                                  | <b>0.946</b> | <b>0.353</b> | <b>0.0074</b> |
| Type 2 diabetes (T2D)                       | 164                 | 0.050         | 0.048        | 0.30          | 164                        | 0.075        | 0.069        | 0.27          | 164                          | 0.032        | 0.059        | 0.59          | 164                                 | 0.069        | 0.099        | 0.48          |
| Cigarettes per day (CPD)                    | 5                   | 0.167         | 0.310        | 0.59          | 5                          | -0.236       | 0.449        | 0.60          | 5                            | 0.015        | 0.381        | 0.97          | 5                                   | -0.887       | 0.637        | 0.16          |
| Asthma                                      | 7                   | <b>0.376</b>  | <b>0.137</b> | <b>0.0061</b> | 7                          | 0.165        | 0.197        | 0.40          | 7                            | <b>0.401</b> | <b>0.169</b> | <b>0.018</b>  | 7                                   | 0.195        | 0.279        | 0.49          |
| Systolic blood pressure (sBP)               | 54                  | 0.011         | 0.011        | 0.35          | 54                         | -0.008       | 0.016        | 0.62          | 54                           | 0.014        | 0.014        | 0.31          | 54                                  | -0.022       | 0.023        | 0.33          |
| Diastolic blood pressure (dBP)              | 41                  | 0.017         | 0.021        | 0.42          | 41                         | -0.022       | 0.030        | 0.46          | 41                           | 0.014        | 0.025        | 0.57          | 41                                  | -0.051       | 0.042        | 0.23          |
| Estimated glomerular filtration rate (eGFR) | 67                  | -0.070        | 0.170        | 0.68          | 67                         | 0.082        | 0.245        | 0.74          | 67                           | 0.027        | 0.209        | 0.90          | 67                                  | 0.147        | 0.347        | 0.67          |
| Serum uric acids (UA)                       | 36                  | 0.163         | 0.095        | 0.088         | 36                         | 0.024        | 0.137        | 0.86          | 36                           | <b>0.279</b> | <b>0.119</b> | <b>0.019</b>  | 36                                  | 0.216        | 0.199        | 0.28          |
| Gout                                        | 10                  | <b>0.078</b>  | <b>0.028</b> | <b>0.0048</b> | 10                         | 0.018        | 0.039        | 0.65          | 10                           | <b>0.104</b> | <b>0.035</b> | <b>0.0027</b> | 10                                  | 0.059        | 0.057        | 0.30          |
| Rheumatoid arthritis (RA)                   | 15                  | -0.065        | 0.048        | 0.18          | 15                         | -0.018       | 0.070        | 0.80          | 15                           | -0.102       | 0.059        | 0.083         | 15                                  | -0.067       | 0.097        | 0.49          |
| Systemic lupus erythematosus (SLE)          | 100                 | <b>-0.087</b> | <b>0.027</b> | <b>0.0014</b> | 100                        | -0.060       | 0.039        | 0.12          | 100                          | -0.058       | 0.033        | 0.084         | 100                                 | 0.022        | 0.056        | 0.70          |

| Exposure phenotypes (European)              | Self-reported COVID-19 (C2) |              |              |                            | Hospitalized COVID-19 (B2) |              |              |                             | Severe COVID-19 (A2) |               |              |                            |
|---------------------------------------------|-----------------------------|--------------|--------------|----------------------------|----------------------------|--------------|--------------|-----------------------------|----------------------|---------------|--------------|----------------------------|
|                                             | N <sub>SNP</sub>            | Beta         | SE           | P                          | N <sub>SNP</sub>           | Beta         | SE           | P                           | N <sub>SNP</sub>     | Beta          | SE           | P                          |
| Body mass index (BMI)                       | 486                         | <b>0.175</b> | <b>0.030</b> | <b>8.5×10<sup>-9</sup></b> | 486                        | <b>0.398</b> | <b>0.060</b> | <b>3.2×10<sup>-11</sup></b> | 486                  | <b>0.405</b>  | <b>0.090</b> | <b>6.2×10<sup>-6</sup></b> |
| Type 2 diabetes (T2D)                       | 414                         | <b>0.027</b> | <b>0.012</b> | <b>0.019</b>               | 413                        | <b>0.061</b> | <b>0.023</b> | <b>0.0078</b>               | 417                  | 0.068         | 0.035        | 0.050                      |
| Cigarettes per day (CPD)                    | 39                          | 0.032        | 0.067        | 0.63                       | 39                         | 0.255        | 0.132        | 0.054                       | 39                   | 0.096         | 0.199        | 0.63                       |
| Asthma                                      | 124                         | -0.026       | 0.017        | 0.14                       | 119                        | -0.025       | 0.035        | 0.48                        | 124                  | -0.059        | 0.052        | 0.26                       |
| Systolic blood pressure (sBP)               | 396                         | -0.0015      | 0.0018       | 0.41                       | 394                        | 0.0019       | 0.0036       | 0.59                        | 396                  | -0.0036       | 0.0055       | 0.51                       |
| Diastolic blood pressure (dBP)              | 408                         | -0.0038      | 0.0030       | 0.20                       | 405                        | -0.0021      | 0.0061       | 0.72                        | 407                  | -0.011        | 0.009        | 0.25                       |
| Estimated glomerular filtration rate (eGFR) | 256                         | 0.014        | 0.211        | 0.95                       | 255                        | -0.459       | 0.423        | 0.28                        | 256                  | <b>-1.315</b> | <b>0.649</b> | <b>0.043</b>               |
| Serum uric acids (UA)                       | 121                         | -0.013       | 0.019        | 0.51                       | 121                        | 0.028        | 0.038        | 0.46                        | 122                  | 0.048         | 0.056        | 0.39                       |
| Gout                                        | 27                          | -0.007       | 0.012        | 0.58                       | 27                         | -0.020       | 0.024        | 0.42                        | 28                   | -0.009        | 0.036        | 0.81                       |
| Rheumatoid arthritis (RA)                   | 63                          | -0.010       | 0.011        | 0.37                       | 63                         | -0.028       | 0.022        | 0.20                        | 63                   | 0.028         | 0.033        | 0.40                       |
| Systemic lupus erythematosus (SLE)          | 41                          | -0.011       | 0.007        | 0.11                       | 41                         | -0.016       | 0.014        | 0.25                        | 41                   | -0.024        | 0.020        | 0.24                       |

Uncorrected *P* values are shown. Associations with *P* < 0.05 are highlighted in bold.

**Supplementary Table 8. Detailed associations of the *DOCK2* rs60200309-A allele with COVID-19 susceptibility**

| Recruitment period    | Age      | Phenotype                              | No. subjects |          | Risk allele frequency (A) |          | OR (95%CI)       | <i>P</i>             |
|-----------------------|----------|----------------------------------------|--------------|----------|---------------------------|----------|------------------|----------------------|
|                       |          |                                        | Cases        | Controls | Cases                     | Controls |                  |                      |
| April 2020 - Jan 2021 | All age  | COVID-19 vs control                    | 2,393        | 3,289    | 0.119                     | 0.101    | 1.24 (1.09-1.41) | 0.0011               |
|                       |          | Severe COVID-19 vs control             | 990          | 3,289    | 0.129                     | 0.101    | 1.39 (1.16-1.66) | 3.1×10 <sup>-4</sup> |
|                       |          | Non-Severe COVID-19 vs control         | 1,391        | 3,289    | 0.113                     | 0.101    | 1.16 (1.00-1.35) | 0.054                |
|                       |          | Severe COVID-19 vs Non-Severe COVID-19 | 990          | 1,391    | 0.129                     | 0.113    | 1.27 (1.03-1.57) | 0.028                |
|                       | Age < 65 | COVID-19 vs control                    | 1,484        | 2,377    | 0.123                     | 0.099    | 1.32 (1.13-1.55) | 5.1×10 <sup>-4</sup> |
|                       |          | Severe COVID-19 vs control             | 440          | 2,377    | 0.159                     | 0.099    | 2.01 (1.58-2.55) | 1.2×10 <sup>-8</sup> |
|                       |          | Non-Severe COVID-19 vs control         | 1,041        | 2,377    | 0.107                     | 0.099    | 1.08 (0.90-1.30) | 0.39                 |
|                       |          | Severe COVID-19 vs Non-Severe COVID-19 | 440          | 1,041    | 0.159                     | 0.107    | 1.90 (1.43-2.52) | 1.1×10 <sup>-5</sup> |
|                       | Age ≥ 65 | COVID-19 vs control                    | 909          | 912      | 0.113                     | 0.106    | 1.08 (0.86-1.35) | 0.50                 |
|                       |          | Severe COVID-19 vs control             | 550          | 912      | 0.104                     | 0.106    | 0.93 (0.71-1.22) | 0.61                 |
|                       |          | Non-Severe COVID-19 vs control         | 350          | 912      | 0.129                     | 0.106    | 1.30 (0.98-1.73) | 0.069                |
|                       |          | Severe COVID-19 vs Non-Severe COVID-19 | 550          | 350      | 0.104                     | 0.129    | 0.75 (0.54-1.03) | 0.074                |

Uncorrected *P* values are shown.



**Supplementary Table 9. A replication study of the *DOCK2* variant in the pan-ancestry meta-analysis**

| Study         | Ancestry | No. subjects |          | Risk allele frequency<br>(rs60200309-A) | OR (95%CI)       | P     |
|---------------|----------|--------------|----------|-----------------------------------------|------------------|-------|
|               |          | Cases        | Controls |                                         |                  |       |
| UK Biobank    | EUR      | 1,824        | 428,622  | 0                                       | 0.44 (0.06-3.10) | 0.41  |
|               | AFR      | 83           | 9,193    | 0                                       | 0.22 (0.00-30.5) | 0.55  |
|               | SAS      | 71           | 10,252   | 0.00029                                 | 4.49 (0.51-39.6) | 0.18  |
| AncestryDNA   | EUR      | 636          | 72,097   | N.A.                                    | 4.38 (1.10-17.5) | 0.037 |
|               | AFR      | 91           | 3,605    | N.A.                                    | 0.60 (0.03-11.1) | 0.73  |
|               | AMR      | 104          | 7,653    | N.A.                                    | 1.87 (0.83-4.23) | 0.13  |
| FinnGen       | EUR      | 82           | 238,353  | 0                                       | 0.35 (0.01-26.9) | 0.64  |
| Geisinger     | EUR      | 180          | 112,862  | 0                                       | 0.25 (0.00-30.0) | 0.57  |
| UPENN         | AFR      | 67           | 8,738    | 0                                       | 0.40 (0.00-43.3) | 0.70  |
| Meta-analysis |          | 3,138        | 891,375  | 0.00082                                 | 1.73 (0.95-3.15) | 0.072 |

EUR; European, AFR; African, AMR; American.

We obtained the association of the *DOCK2* variant (rs60200309) from the pan-ancestry meta-analysis available at <https://rgc-covid19.regeneron.com/>. We obtained the meta-analysis results of the phenotype of “hospitalized COVID-19 vs COVID-19 negative or COVID-19 status unknown” with the largest case sample size. Uncorrected *P* values are shown.

**Supplementary Table 10. eQTL analysis result of the variants around the *DOCK2* region**

(Results are indicated in a separate Microsoft Excel file)

**Supplementary Table 11. The guide RNA for *DOCK2* knockdown used in LentiCRISPR system and sgRNA sequence annotation**

|            | sgRNA Target Sequence | Rule Set 2 score | Cutting Frequency Determination score |
|------------|-----------------------|------------------|---------------------------------------|
| DOCK2 KO#1 | GAGAACTACCTAGTGCGATG  | 0.722            | 94                                    |
| DOCK2 KO#2 | GATGGGACTACTCTACACGA  | 0.712            | 97                                    |
| DOCK2 KO#3 | GCCAATCCTAAGAACGCTGA  | 0.633            | 94                                    |

Rule Set 2 score is used to calculate the on-target efficacy, and Cutting Frequency Determination (CFD) score is used to calculate the potential off-target efficacy.

**Supplementary Table 12. The primers and probes used for evaluation of lung cytokine expression profile in SARS-CoV-2 infected Syrian hamster**

| Gene         | Primer  | Sequence(5'→3')                |
|--------------|---------|--------------------------------|
| <i>Ifna</i>  | Forward | CTGCCTCAGGCTCCTAACCTCAGGAACAAT |
|              | Reverse | GTGGTGATGAGCTATTGGTCGA         |
|              | Probe   | GGGAAAGTCTCATTCTTTTCAGGAG      |
| <i>Ifnb</i>  | Forward | TTCAACAACACTTTCTCCAGCACTGGGTGG |
|              | Reverse | CATCCAAGAGATGCTCCAGAATATC      |
|              | Probe   | CCTCTGGCACTTCCTTTAGGG          |
| <i>Ifng</i>  | Forward | CAGAGGAGCATAGACACCATCAAGGCAGAC |
|              | Reverse | CCTTGAAGGACAACCAGGC            |
|              | Probe   | CCTGAAGGTCATTTACCGGAATC        |
| <i>Il6</i>   | Forward | ACAAAGCCAGAGTCATTCAGAGCACCATCA |
|              | Reverse | GTGACGAACAATGTACAAGATAACAA     |
|              | Probe   | CGTGACTATTTTATCTGGACCCTTTA     |
| <i>Ccl3</i>  | Forward | CAGATTTCCCGCAAATTCATCGCCGACT   |
|              | Reverse | CCTCCTGCTGCTTCTTCTATGG         |
|              | Probe   | CGGTTTCTCTTGTTAGGAAAATGA       |
| <i>Ccl5</i>  | Forward | CACTCCCTGCTGCTTTGACTACCTCTCCTT |
|              | Reverse | CGCTCCTTCATCTGCCTCC            |
|              | Probe   | CTTCGGGTGACAAAAACGACTG         |
| <i>Ip-10</i> | Forward | AAGGAATCCCTCTTTCAAGGACAGTCCGCT |
|              | Reverse | CATCCTGCTGAGTCTGAGTGG          |
|              | Probe   | CCCAAGGCCCTCGGTTTTAC           |
| <i>Gapdh</i> | Forward | AGCCTTGACTGTGCCTTTGAACTTGCCA   |
|              | Reverse | CCTTCATTGACCTCAACTACATGG       |
|              | Probe   | GCTCCTGGAAGATGGTGATGG          |
